# Supplementary material for: Essential multimeric enzymes in kinetoplastid parasites: A host of potentially druggable protein-protein interactions
Source: PLoS Negl Trop Dis. 2017 Jun 29;11(6):e0005720. doi: 10.1371/journal.pntd.0005720 (PMC5507555; doi:10.1371/journal.pntd.0005720)
Supplement: S5 Table — (XLSX) [file pntd.0005720.s006.xlsx]

## Sheet: Table S5Done
Table S5 - sequence identity and conservation of hotspots
LiTryR	LIRESGGFGWEMD
TbTryR	HLRESAGFGWEFD
CfTryR	TIRESAGFGWELD
TcTryR	HLRESAGFGWEFD
LmTXNPx	NDMPVGR
TbTXNPx	NDLPVGR
CfTXNPx	NDMPIGR
TcTXNPx	NDLPVGR
LMG6PDH	AMYVKITTKVPGLSGDLRQTHQTEL
TbG6PDH	AMYLRLTAKTPGVLSDTHQTEL
TcG6PDH	AMYLKLTAKTPGLLNDTHQTEL
TcRpiB	RIEKIRAIEASH
TbRpiB	RLEKIKAAESNT
LmRpiB	RVDKITVIEEEQ
TbGalE	PLKYYDNNVVGILRLL
TcGalE	PLKYYDNNVIGIIRLL
LmGalE	PLRYYDNNVVGMLRIL
LmPTR1	TIYTMAKGALEGLTRSAALEL
TbPTR1	SLYNMGKHALVGLTQSAALEL
CfPTR1	TAYTMGKAALEGLTRSAALEL
TcPTR2	CVYTMAKHALGGLTRAAALEL
